25 **Abstract**

26 Emerging evidences have confirmed effects of meteorological factors on novel  
27 coronavirus disease 2019 (COVID-19). However, few studies verify the impact of air  
28 pollutants on this pandemic. This study aims to explore the association of ambient air  
29 pollutants, meteorological factors and their interactions effect confirmed case counts  
30 of COVID-19 in 120 Chinese cities. Here, we collected total confirmed cases of  
31 COVID-19 by combining with meteorological factors and air pollutants data from  
32 15th January 2020 to 18th March 2020 in 120 Chinese cities. Spearman correlation  
33 analysis was employed to estimate the association between two variables; univariate  
34 and multivariate negative binomial regression analysis were applied to explore the  
35 effect of air pollutants and meteorological parameters on the COVID-19 confirmed  
36 cases. Positive associations were found between the confirmed cases of COVID-19  
37 and carbon monoxide (CO), aerodynamic particulate matter with aerodynamic  
38 diameter  $\leq 2.5 \mu\text{m}$  (PM<sub>2.5</sub>), relative humidity (RH) and air pressure (AP). And  
39 negative association was found for sulfur dioxide (SO<sub>2</sub>). In addition, multivariate  
40 negative binomial regression analysis suggested that confirmed cases of COVID-19  
41 was positively correlated with ozone (O<sub>3</sub>) in lag 0 day while it was negatively  
42 associated with wind velocity (WV) in lag 14 days, and the pollutants-meteorological  
43 factors interactions also associate with COVID-19. In conclusions, air pollutants and  
44 meteorological factors and their interactions all associate with COVID-19.

45 **Keywords:** COVID-19; meteorological parameters; air pollutants; interactions

46

47

48

49

## 50 **1. Introduction**

51 In December of 2019, a novel coronavirus disease (COVID-19) caused by severe  
52 acute respiratory syndrome coronavirus 2 (SARS-CoV-2) reported in Wuhan City, P.  
53 R. China (Wu et al., 2020; Zhou et al., 2020). COVID-19 outbreak has rapidly spread  
54 across China and many other countries (Holshue et al., 2020; Huang et al., 2017; Lai  
55 et al., 2020; Wang et al., 2020a), and emerging evidence indicates that the etiologic  
56 agent of COVID-19 may affect the physical and mental health of us like cough,  
57 myalgia, loss of appetite, have a fever, olfactory and gustatory dysfunctions, cause  
58 neurological complications (De Felice et al., 2020; Lechien et al., 2020) and anxiety  
59 (Wang et al., 2020b). Due to the great transmissibility and wide spreading, COVID-19  
60 has officially been declared a pandemic by the World Health Organization (WHO) on  
61 March 11th, 2020  
62 (<https://www.who.int/emergencies/diseases/novel-coronavirus-2019>). By March 18th,  
63 2020, COVID-19 have become prevalent in more than 160 countries around the world,  
64 with a total of 191127 confirmed cases worldwide  
65 (<https://www.who.int/emergencies/diseases/novel-coronavirus-2019/situation-reports/>);  
66 and 80928 confirmed cases have been reported in China  
67 ([http://www.nhc.gov.cn/xcs/xxgzbd/gzbd\\_index.shtml](http://www.nhc.gov.cn/xcs/xxgzbd/gzbd_index.shtml)). This makes the world face a  
68 huge public health crisis.

69 Air pollutants can significantly affects health, and WHO announces 4.6 million  
70 individuals were died annually from diseases and illnesses directly related to poor air  
71 quality (Tobias and Molina, 2020). Particularly, increasing studies explore the  
72 relationship between air pollution and infectious diseases. A previous study reported  
73 that there was no relationship between air pollution and SARS outbreaks (Cai et al.,  
74 2007; Tobias and Molina, 2020; Yusuf et al., 2007). A positive association was

75 observed between air pollutants (sulfur dioxide, nitrogen dioxide, carbon monoxide  
76 and ground-level ozone) and SARS case fatality (Cui et al., 2003). Another study in  
77 Brisbane suggested that high concentrations of O<sub>3</sub> and PM<sub>10</sub> were associated with  
78 more pediatric influenza cases (Xu et al., 2013).

79 Meteorological factors are regarded as an independent factor affecting the  
80 spreading of infectious diseases (Cai et al., 2007; Xie and Zhu, 2020). Although the  
81 association between virus that result in respiratory disease (SARS, influenza viral and  
82 SARS-CoV-2) and meteorological factors had been explored (Yusuf et al., 2007), the  
83 results of these studies were controversial or inconclusive. For example, Tan's study  
84 showed sharply change of ambient temperature was correlated to increase the risk of  
85 SARS (Tan et al., 2005), while another study by Yao claimed ambient temperature had  
86 no significant effect on the transmissibility of SARS-CoV-2 (Yao et al., 2020a) and  
87 more studies indicated that the increase of average temperature contributed to an  
88 average relative risk (RR) and the decrease of daily SARS confirmed case counts (Cai  
89 et al., 2007). These inconsistent results implied that whether the interaction of  
90 pollutants-meteorological have influenced the transmission of these diseases.

91 The trends of the SARS outbreak may be influenced by air pollutants and  
92 meteorological factors which would have changed the host susceptibility and the  
93 survival time of SARS-CoV in vitro (Cai et al., 2007). COVID-19 infections can  
94 cause serious respiratory diseases, the common symptoms at the beginning includes  
95 fever, cough, muscle aches or fatigue, etc. which is similar to severe acute respiratory  
96 syndrome coronavirus (SARS-CoV) (Liu et al., 2020b; Siordia, 2020), and the similar  
97 effect of air pollutants or meteorological factors on confirmed COVID-19 cases was  
98 also observed (Jiang et al., 2020; Liu et al., 2020a; Oliveiros et al., 2020; Wang et al.,  
99 2020c; Zhu et al., 2020); however, the interaction effects of air pollutants and

100 meteorological factors remained out of consideration. In this study, we investigate the  
101 association of ambient air pollutants and meteorological factors effects and, especially  
102 their interaction effects on COVID-19 confirmed cases, for extending and further  
103 understanding the relations of transmission of this disease and environmental factors.

104

## 105 **2. Methods**

### 106 **2.1 Data collection**

107 We observed the numbers of the confirmed cases in relation to air pollutants and  
108 meteorological parameters in 120 Chinese cities (to better fit the model, we delete the  
109 data of Wuhan since confirmed case counts are large in it and the data of Wuhan may  
110 reduce the robustness of the model) that covered the majority of the Chinese mainland  
111 with no less than 5 cases during 15 January 2020 to 18 March 2020. Daily confirmed  
112 case counts and daily air pollutants were collected from the official websites of  
113 Harvard University (<https://dataverse.harvard.edu>). Meteorological data were obtained  
114 from China Meteorological Data Sharing Service System  
115 (<http://data.cma.cn/site/index.html>), respectively. Air pollutants data included  
116 particulate matter with aerodynamic particulate matter with aerodynamic diameter  $\leq$   
117  $2.5 \mu\text{m}$  ( $\text{PM}_{2.5}$ ), nitrogen dioxide ( $\text{NO}_2$ ), and sulfur dioxide ( $\text{SO}_2$ ), carbon monoxide  
118 ( $\text{CO}$ ), ozone ( $\text{O}_3$ ). Meteorological parameters including average temperature ( AT ),  
119 diurnal temperature range ( DTR ), relative humidity (RH), wind velocity (WV), air  
120 pressure (AP), precipitation (PRE), and hours of sunshine (HS) . The means of daily  
121 pollutants concentration and meteorological factors value in every city were  
122 calculated to represent the responding variable in that city during the whole period.

123 Therefore, there is no need to have ethical review.

## 124 **2.2 Statistical analysis**

125 The descriptive analysis was performed for all the data to explore the characteristics  
126 of total confirmed case counts, the average concentration of O<sub>3</sub>, NO<sub>2</sub>, SO<sub>2</sub>, CO, and  
127 PM<sub>2.5</sub>, AT, DTR, RH, WV, AP, PRE and HS. Meanwhile, we account for the lag effect  
128 and the latent period of COVID-19, we evaluated the associations in lag 0, 3, 7 and 14  
129 d between confirmed case counts and these air pollutants and meteorological factors  
130 (Liu et al., 2020a). Spearman correlation analysis was employed to explore the  
131 correlation of meteorological factors and air pollutants; associations between air  
132 pollutants, meteorological factors and confirmed case counts. We adopted generalized  
133 linear models with negative binomial regression to analyze the associations between  
134 air pollutants factors (O<sub>3</sub>, NO<sub>2</sub>, SO<sub>2</sub>, CO, PM<sub>2.5</sub>), meteorological factors (AT, DTR,  
135 RH, WV, AP, PRE and HS) and the total counts of confirmed case as this count data is  
136 clustered and may be over-dispersed. We first establish a univariate negative binomial  
137 regression models to analyze the air pollutants and meteorological factors and the  
138 confirmed case counts, then we conducted multivariate negative binomial regression  
139 models that including all above-mentioned factors since the independent variables are  
140 not serious related (all |rs|<0.9). The core negative binomial regression equation is:  
141  $\text{Log}(\lambda) = \beta_0 + \beta_1 X_1 + \beta_2 X_2 + \dots + \beta_m X_m$ ,  $\lambda$  here is the confirmed case counts, and X<sub>1</sub>,  
142 X<sub>2</sub>, X<sub>m</sub> are the factors that affect  $\lambda$ , and  $\beta_1$ ,  $\beta_2$ ,  $\beta_m$  are the correlation coefficient of X<sub>1</sub>,  
143 X<sub>2</sub>, X<sub>m</sub>. To explore the interaction effects, we force X<sub>i</sub>\*X<sub>j</sub> as an interaction term in the  
144 previous model, where X<sub>i</sub> represents an air pollutant and X<sub>j</sub> represents a  
145 meteorological factor. We put only one interaction term in one model fit for  
146 cautiousness.

147 All the statistical analyses were performed by employing SPSS version 22.0 (SPSS

148 Inc., Chicago, IL, USA) and R software (version 3.6.3) with two-sided  $P$  value  $< 0.05$   
149 considered as statistically significant.

### 150 **3. Results**

#### 151 **3.1 Study area**

152 Figure 1 showed the locations of these 120 cities in China mainland and the total  
153 confirmed cases in each city was collected in March 18, 2020. The latitude range of  
154 these 120 cities is  $20^{\circ}00'$  to  $47^{\circ}23'N$ , and the longitude range is  $99^{\circ}11'$  to  $130^{\circ}55'E$ .

### Figure 1

155

156

#### 157 **3.2 Description of confirmed COVID-19 cases, meteorological factors and air** 158 **pollutants**

159 The maximum and minimum values, median, interquartile range, and other indicators  
160 number of confirmed cases, ambient air pollutants and meteorological factors of the  
161 assigned 120 cities were described in Table 1. Among these cities, during our study  
162 period (Jan 15 to Mar 18, 2020), the median of daily concentrations of CO, NO<sub>2</sub>, SO<sub>2</sub>,  
163 O<sub>3</sub> and PM<sub>2.5</sub>, were 0.82 mg/m<sup>3</sup>, 20.89 μg/m<sup>3</sup>, 8.23 μg/m<sup>3</sup>, 56.38μg/m<sup>3</sup>, and 43.58  
164 μg/m<sup>3</sup>, respectively. The ranges of RH, AT, PRE, AP, HS, WV, DTR were  
165 35.42%~85.50%, -12.48~21.29 (°C), 0.00~6.82 mm, 758.41~1024.43 hPa, 1.60~9.20  
166 (h), 1.00~5.05 (s/m), 5.13~18.37 (°C), respectively.

167 **Table1** Summary of total confirmed COVID-19 cases, meteorological data and air  
168 pollutants of 120 cities

| Variables             | Min  | P25   | P50   | P75   | Max     |
|-----------------------|------|-------|-------|-------|---------|
| confirmed case counts | 5.00 | 13.50 | 35.50 | 81.00 | 3518.00 |

| Concentrations of air pollutants                  |        |        |         |        |         |
|---------------------------------------------------|--------|--------|---------|--------|---------|
| CO (mg/m <sup>3</sup> )                           | 0.42   | 0.69   | 0.82    | 0.98   | 1.67    |
| NO <sub>2</sub> (µg/m <sup>3</sup> ) <sup>□</sup> | 5.06   | 16.65  | 20.89   | 28.06  | 44.01   |
| SO <sub>2</sub> (µg/m <sup>3</sup> )              | 2.70   | 5.92   | 8.23    | 13.83  | 41.74   |
| O <sub>3</sub> (µg/m <sup>3</sup> ) <sup>□</sup>  | 29.63  | 48.42  | 56.38   | 62.66  | 85.94   |
| PM <sub>2.5</sub> (µg/m <sup>3</sup> )            | 13.62  | 30.75  | 43.58   | 59.54  | 94.83   |
| Meteorological factors                            |        |        |         |        |         |
| RH (%)                                            | 35.42  | 62.43  | 73.71   | 79.28  | 85.50   |
| AT (°C)                                           | -12.48 | 2.10   | 8.14    | 10.77  | 21.29   |
| PRE (mm)                                          | 0.00   | 0.36   | 0.95    | 2.64   | 6.82    |
| AP (hPa)                                          | 758.41 | 978.83 | 1008.22 | 1016.4 | 1024.43 |
|                                                   |        |        |         | 3      |         |
| HS(h)                                             | 1.60   | 3.31   | 4.48    | 6.91   | 9.20    |
| WV (m/s) <sup>□</sup>                             | 1.00   | 1.78   | 2.19    | 2.57   | 5.05    |
| DTR (°C)                                          | 5.13   | 6.73   | 8.92    | 10.90  | 18.37   |

169 <sup>□</sup> The data were normal distribution by normal distribution test.  
 170

171 **3.3 Correlation analysis of air pollutants and meteorological factors**

172 Spearman correlation coefficient ( $r_s$ ) between air pollutants concentrations and  
 173 meteorological factors were demonstrated in Figure 2The larger circle indicates  
 174 stronger relation of two variables. Figure 2 showed  $r_s$  for any two variables are less  
 175 than |0.9|. Therefore, in the multivariate negative binomial regression analysis, all the  
 176 variables were integrated into the model.

Figure 2

177  
 178

179 **3.4 Effects of air pollutants and meteorological parameters on confirmed case counts**

181 The scatter plot displayed the relationship between pollutants, meteorological  
 182 parameters and confirmed case counts for lag 14 d in Figure 3. There were positive



183 associated between the confirmed case counts and  $PM_{2.5}$  ( $P=0.024$ ), RH ( $P=0.001$ ),  
184 PRE ( $P=0.015$ ) and AP ( $P<0.001$ ); while there were negative between the confirmed  
185 case counts and  $SO_2$  ( $P<0.001$ ) and HS ( $P=0.018$ ). Meanwhile, we haven't found any  
186 correlations between the confirmed case counts and CO,  $NO_2$ ,  $O_3$ , AT, WV, and DTR.

### Figure 3

187

188

### 189 3.5 Negative binomial regression model analysis

190 Univariate negative binomial regression results were shown in Figure 4. CO,  $NO_2$ ,  
191  $SO_2$ ,  $O_3$ ,  $PM_{2.5}$ , RH, AT, AP, HS, WV were significantly associated with confirmed  
192 cases counts while PRE have no effect on it in lag 0, 3, 7 and 14 d ( $P<0.05$ ); DTR  
193 have except an effect on confirmed cases counts in lag 7 and lag 14 d. Multivariate  
194 negative binomial regression model are shown in Figure 5, CO,  $PM_{2.5}$ , RH and AP are  
195 positive associated with confirmed case counts but  $SO_2$  negative associated with it in  
196 lag 0, 3, 7, and 14 d. However,  $O_3$  have a positive effect on confirmed case counts in  
197 lag 0 d and WV have a positive effect on confirmed case counts in lag 14 d.

198

### Figure 4

199

200

### Figure 5

201

202

### 203 3.6 Interaction effects between air pollutants and meteorological factors

204 The significant interaction effects were showed in table 2. As it shows, most of the  
205 CO-meteorological factor interaction terms were listed. Except for CO\*DTR and  
206 CO\*DHS, other CO-meteorological factor interaction effect is positive to the total of

207 COVID-19 conformed case. We also identify that  $PM_{2.5} * DARH$ ,  $PM_{2.5} * DPRE$ ,  
208  $SO_2 * DAAP$  and  $NO_2 * DAT$  are positive to the number of COVID-19 confirmed cases,  
209 and  $O_3 * DAWV$  are negative to the number of COVID-19 confirmed cases.

210 **Table 2** Ambient air pollutants and meteorological factors interaction on COVID-19  
211 confirmed cases

| Variables         | $\beta$ | Lower 95% CI | Upper 95% CI | P     |
|-------------------|---------|--------------|--------------|-------|
| CO * DAT          | 0.18    | 0.03         | 0.33         | 0.022 |
| CO * DARH         | 0.13    | 0.05         | 0.21         | 0.001 |
| CO * DTR          | -0.35   | -0.64        | -0.06        | 0.018 |
| CO * DPRE         | 0.93    | 0.06         | 1.81         | 0.037 |
| CO * DHS          | -0.79   | -1.35        | -0.23        | 0.006 |
| $PM_{2.5} * DARH$ | 0.00    | 0.00         | 0.00         | 0.032 |
| $SO_2 * DAAP$     | 0.00    | 0.00         | 0.00         | 0.021 |
| $O_3 * DAWV$      | -0.04   | -0.08        | 0.00         | 0.047 |
| $NO_2 * DAT$      | 0.00    | 0.00         | 0.01         | 0.040 |
| $PM_{2.5} * DPRE$ | 0.02    | 0.01         | 0.03         | 0.002 |

212 \* Interaction

213

214

## 215 **4. Discussion**

216 In this paper, we explored the relationship between air pollutants and meteorological  
217 factors and their interactions on confirmed cases counts in 120 Chinese cities, We  
218 focused on these cities due to the meteorological data we have obtained was limited  
219 (not including all the cities in China). Our results indicated that air pollutants and  
220 meteorological factors and their interactions all associate with COVID-19.

221 Many previous studies have showed that the effect of meteorological factors on  
222 infectious diseases (such as influenza, SARS, MERS, COVID-19) (Cai et al., 2007;  
223 Liu et al., 2020a; Prata et al., 2020; Tan et al., 2005; van Doremalen et al., 2013;  
224 Yusuf et al., 2007), however, the effect of air pollutants on infectious diseases  
225 especially COVID-19 is out of consider. Understanding the relationship between

226 ambient air pollutants exposure and health can help us take protective measures to  
227 reduce the risk of exposure and disease. Some researchers have found that the higher  
228 concentration of PM<sub>2.5</sub> the greater healthcare use for acute lower respiratory infection  
229 (Horne et al., 2018) and PM air pollutants was associated with acute respiratory  
230 illness (Pope, 1989). A Ecologic analysis carry out in Chinese demonstrated that air  
231 pollutants have a positive effect on SARS case fatality (Cui et al., 2003). Our research  
232 shows that, air pollutants of CO, PM<sub>2.5</sub> was positively while SO<sub>2</sub> inversely associated  
233 with confirmed COVID-19 cases; NO<sub>2</sub> and O<sub>3</sub> may positively associated with  
234 confirmed COVID-19 cases (Univariate negative binomial regression reach  
235 significance while multivariate negative binomial regression and Spearman  
236 correlation didn't reach significance). Within our perception air pollutants should not  
237 affect survival of COVID-19 in vitro, though it may affect host local resistance.  
238 Therefore, we speculate that exposure to these pollutants makes the body more likely  
239 to infect SARS-CoV-2 and aggravate the severity of its infection. For example,  
240 exposure to ozone modulates human airway protease/ anti-protease balance  
241 contributing to increased influenza A infection , but epidemiological studies do not  
242 shed light on why air pollutants promotes these processes and it only reveals  
243 relationships, hence, further investigations are needed to explain it.

244 Weather variables like air temperature, diurnal temperature range ,relative humidity,  
245 wind velocity, air pressure, precipitation and hours of sunshine are important factors  
246 influencing survival of microorganisms in the external environment (Anwar et al.,  
247 2019; Bezirtzoglou et al., 2011; Casadevall, 2020; Chan et al., 2011; Liu et al., 2020a).

248 For decades, experts have issued warnings that climate change may be related to  
249 changes in the epidemiology of infectious diseases (Casadevall, 2020). Global  
250 warming, rising sea levels, and climate change will be accompanied by new and  
251 unknown diseases (Bezirtzoglou et al., 2011; Casadevall, 2020). Weather variables  
252 can change the host's behavior (such as spending more time indoors or outdoors), and  
253 it can change the host's defense mechanism (inhalation of dry and cold air will cause  
254 damage to the cleaning function of cilia) or change the infectivity and stability of the  
255 virus, a study found that it seemed that the confirmed COVID-19 case number  
256 increase with temperature increasing in the range of  $-20^{\circ}\text{C}\sim 20^{\circ}\text{C}$ . However, with  
257 DTR in the range of  $5^{\circ}\text{C}\sim 15^{\circ}\text{C}$  the confirmed case number decreased, and the  
258 relationship between it and absolute humidity shows a non-linear relationship (Liu et  
259 al., 2020a). In addition, other studies have shown that when the average temperature is  
260 below  $3^{\circ}\text{C}$ , it is positively correlated with confirmed COVID-19 case counts (Xie and  
261 Zhu, 2020). A Brazilian study shows that a negative linear relationship between  
262 temperatures and daily cumulative confirmed cases of COVID-19 in the range from  
263  $16.8^{\circ}\text{C}$  to  $27.4^{\circ}\text{C}$  (Xie and Zhu, 2020). Besides, a study involving 244 cities in  
264 China shows no significant associations between relative humidity, maximum  
265 temperature, minimum temperature and cumulative incidence rate or  $R_0$  of COVID-19  
266 (Yao et al., 2020b). The temperature range of this work is  $-12.48 \sim 21.29^{\circ}\text{C}$ , and our  
267 results show that RH is positively correlated with confirmed COVID-19 cases and AT,  
268 DTR may be related to confirmed case counts. This reveals that SARS-CoV-2 can  
269 adapt to higher temperatures. In addition, the experimental results of the University of  
270 Hong Kong show that the virus is very stable at  $4^{\circ}\text{C}$ , but as the culture temperature  
271 increased to  $70^{\circ}\text{C}$ , the virus inactivation time was shortened to 5 minutes (Chin et al.,  
272 2020). The relationship between coronavirus and RH is not a monotonic linear

273 relationship, and the survival rate is greater at low RH (20%) and high RH (80%) than  
274 at moderate RH (50%).

275 Wenqi Hu's (Hu et al., 2018) research suggests low wind velocity may increase  
276 mumps risk of Mumps. The research by Cai QC et al. shows that the larger the daily  
277 average wind velocity, the smaller the secondary attack rate (Cai et al., 2007). Our  
278 multivariate negative binomial regression (lag 14 d) showed with higher wind velocity  
279 may decrease confirmed case counts, consistent with previous research results. Wind  
280 can affect how long droplets are suspended in the air. In indoor environments, high  
281 wind speeds mean that the rooms are well ventilated and in outdoor environments,  
282 high wind speeds are beneficial to the dilution and removal of droplets, both of which  
283 can shorten their suspension time in the air (Cai et al., 2007). Our work found that air  
284 pressure may increase the confirmed case counts, but previous studies have reached  
285 the opposite conclusion that high air pressure may reduce the suspending time of  
286 SARS-CoV in the air (Cai et al., 2007). Our results indicate that hours of sunshine  
287 may reduce the confirmed case counts, which may be related to the sensitivity of  
288 SARS-CoV-2 to ultraviolet rays. About rainfall, some epidemiological data generally  
289 seem to support the relationship between influenza virus infection and precipitation  
290 (Pica and Bouvier, 2012). A study found a significant association between rainfall and  
291 influenza virus infection in India, and in the dry season there are few reports of  
292 infection (Agrawal et al., 2009). And association between precipitation and respiratory  
293 syncytial virus infection has also been seen in other studies. In our study, Spearman  
294 correlation analysis showed PRE was positive relate to confirmed case counts ,

295 however, univariate and multivariate negative binomial regression analysis did not  
296 find the relationship between precipitation and confirmed case counts , as this finding  
297 results from investigations in only Chinese areas, further studies need to be  
298 conducted.

299 Although to our knowledge there was no report indicating the interaction effect  
300 between air pollutants and meteorological factors existing in the onset of respiratory  
301 infectious disease, the interaction effects of these factors were identified in  
302 noninfectious disease (Huang et al., 2017) or unclassified cases (Chen et al., 2019). In  
303 this study, we observed the interaction effects on total number of COVID-19  
304 conformed case, especially the pollutant CO interacted with most other  
305 meteorological factors, which indicates that the effect of CO in increasing total  
306 number of COVID-19 conformed case varies depending on the value of a named  
307 meteorological factor. The interaction effects of PM<sub>2.5</sub> by DARH or DPRE, NO<sub>2</sub> by  
308 DAT were identified at significant level, even though these coefficients were much  
309 closed to zero. The interaction effects of CO\*DTR is negative (-0.35), which indicates  
310 there was an antagonistic effect between these two factors. The exact mechanics  
311 behind all the interaction effects are still unclear for the limitation of this study.

312 This is the first time that we have comprehensively evaluated the effect of  
313 environmental pollution factors and meteorological factors on the confirmed  
314 COVID-19 case number, which gave us a further understanding of the risk factors of  
315 COVID-19. Of course, the limitation of our research is that we only analyzed the data  
316 of 120 cities in China. Further research should cross more countries and regions to  
317 clarify the effect of environmental air pollutants on COVID-19.

318

## 319 **5. Conclusion**

320 Our work implicates that air pollutants and meteorological factors and their  
321 interactions all associate with COVID-19, the increased number of confirmed  
322 COVID-19 case was accompanied by exposure to higher concentrations of CO, PM<sub>2.5</sub>  
323 and higher RH, AP, and increased confirmed COVID-19 cases was accompanied by  
324 exposure to lower concentrations of SO<sub>2</sub>. Our research shows that it may be possible  
325 to reduce the transmission of COVID-19 by 1. reducing the concentrations of CO and  
326 PM<sub>2.5</sub> in the air, 2. lower the RH and AP, but government public health precautions are  
327 essential.

328

## 329 **Credit author statement**

330 Jianli Zhou and Linyuan Qin: conceptualization, methodology, data curation,  
331 writing-original draft preparation, visualization, investigation. Nan Liu: supervision,  
332 validation, writing- reviewing and editing.

333

334

## 335 **Acknowledgements**

336 The authors gratefully acknowledge the financial supports by the National Natural  
337 Science Foundation of China (Nos. 81872584 and 81273078), the National 863  
338 Young Scientist Program (No. 2015AA020940), the Science and Technology  
339 Program of Guangzhou (No. 201704020056), and the Scientific Research Project for  
340 University of Education Bureau of Guangzhou (No. 201831841).

341

## 342 **Declaration of Competing Interest**

343 All the authors in the study declare no potential conflicts of interest.

344

345

## 346 **Reference**

347

348 Agrawal AS, Sarkar M, Chakrabarti S, et al., 2009. Comparative evaluation of real-time PCR and  
349 conventional RT-PCR during a 2 year surveillance for influenza and respiratory syncytial  
350 virus among children with acute respiratory infections in Kolkata, India, reveals a distinct  
351 seasonality of infection. *J Med Microbiol.* 58 (1473-5644 (Electronic)), 1616-1622.  
352 <https://doi.org/10.1099/jmm.0.011304-0>.

353 Anwar A, Anwar S, Ayub M, et al., 2019. Climate change and infectious diseases: evidence from  
354 highly vulnerable countries. *Iran J Public Health.* (2251-6085 (Print)), 2187-2195.

355 Bezirtzoglou C, Dekas K, Charvalos E. 2011. Climate changes, environment and infection: facts,  
356 scenarios and growing awareness from the public health community within Europe.  
357 *Anaerobe* 17 (6), 337-40. <https://doi.org/10.1016/j.anaerobe.2011.05.016>.

358 Cai QC, Lu J, Xu QF, et al., 2007. Influence of meteorological factors and air pollution on the  
359 outbreak of severe acute respiratory syndrome. *Public Health* 121 (4), 258-65.  
360 <https://doi.org/10.1016/j.puhe.2006.09.023>.

361 Casadevall A. 2020. Climate change brings the specter of new infectious diseases. *J Clin Invest*  
362 130 (2), 553-555. <https://doi.org/10.1172/JCI135003>.

363 Chan KH, Peiris JS, Lam SY, et al., 2011. The effects of temperature and relative humidity on the  
364 viability of the SARS Coronavirus. *Adv Virol* 2011 734690.  
365 <https://doi.org/10.1155/2011/734690>.

366 Chen Y, Zheng M, Lv J, et al., 2019. Interactions between ambient air pollutants and temperature  
367 on emergency department visits: Analysis of varying-coefficient model in Guangzhou,  
368 China. *Sci Total Environ* 668 825-834. <https://doi.org/10.1016/j.scitotenv.2019.03.049>

369 Chin AWH, Chu JTS, Perera MRA, et al., 2020. Stability of SARS-CoV-2 in different  
370 environmental conditions. *The Lancet Microbe* 1 (1), e10.  
371 [https://doi.org/10.1016/S2666-5247\(20\)30003-3](https://doi.org/10.1016/S2666-5247(20)30003-3).

372 Cui Y, Zhang ZF, Froines J, et al., 2003. Air pollution and case fatality of SARS in the People's  
373 Republic of China: an ecologic study. *Environ Health* 2 (1), 15.  
374 <https://doi.org/10.1186/1476-069X-2-15>.

375 De Felice FG, Tovar-Moll F, Moll J, et al., 2020. Severe acute respiratory syndrome coronavirus 2  
376 (SARS-CoV-2) and the central nervous system. *Trends Neurosci.*  
377 <https://doi.org/10.1016/j.tins.2020.04.004>.

378 Holshue ML, DeBolt C, Lindquist S, et al., 2020. First case of 2019 novel coronavirus in the  
379 United States. *N Engl J Med* 382 (10), 929-936.  
380 <https://doi.org/10.1056/NEJMoa2001191>.

381 Home BD, Joy EA, Hofmann MG, et al., 2018. Short-term elevation of fine particulate matter air



- 382 pollution and acute lower respiratory infection. *Am J Respir Crit Care Med* 198 (6),  
383 759-766. <https://doi.org/10.1164/rccm.201709-1883OC>.
- 384 Hu W, Li Y, Han W, et al., 2018. Meteorological factors and the incidence of mumps in Fujian  
385 province, China, 2005-2013: non-linear effects. *Sci Total Environ* 619-620 1286-1298.  
386 <https://doi.org/10.1016/j.scitotenv.2017.11.108>.
- 387 Huang CH, Lin HC, Tsai CD, et al., 2017. The interaction effects of meteorological factors and  
388 air pollution on the development of acute coronary syndrome. *Sci Rep* 7 44004.  
389 <https://doi.org/10.1038/srep44004>
- 390 Jiang Y, Wu XJ, Guan YJ. 2020. Effect of ambient air pollutants and meteorological variables on  
391 COVID-19 incidence. *Infect Control Hosp Epidemiol* 1-11.  
392 <https://doi.org/10.1017/ice.2020.222>.
- 393 Lai CC, Shih TP, Ko WC, et al., 2020. Severe acute respiratory syndrome coronavirus 2  
394 (SARS-CoV-2) and coronavirus disease-2019 (COVID-19): The epidemic and the  
395 challenges. *Int J Antimicrob Agents* 55 (3), 105924.  
396 <https://doi.org/10.1016/j.ijantimicag.2020.105924>.
- 397 Lechien JR, Chiesa-Estomba CM, De Siati DR, et al., 2020. Olfactory and gustatory dysfunctions  
398 as a clinical presentation of mild-to-moderate forms of the coronavirus disease  
399 (COVID-19): a multicenter European study. *Eur Arch Otorhinolaryngol* 1-11.  
400 <https://doi.org/10.1007/s00405-020-05965-1>.
- 401 Liu J, Zhou J, Yao J, et al., 2020a. Impact of meteorological factors on the COVID-19  
402 transmission: a multi-city study in China. *Sci Total Environ* 726 138513.  
403 <https://doi.org/10.1016/j.scitotenv.2020.138513>.
- 404 Liu K, Chen Y, Lin R, et al., 2020b. Clinical features of COVID-19 in elderly patients: a  
405 comparison with young and middle-aged patients. *J Infect* 80 (6), e14-e18.  
406 <https://doi.org/10.1016/j.jinf.2020.03.005>.
- 407 Oliveiros B, Caramelo L, Ferreira NC, et al., 2020. Role of temperature and humidity in the  
408 modulation of the doubling time of COVID-19 cases. *medRxiv* 2020.03.05.20031872.  
409 <https://doi.org/10.1101/2020.03.05.20031872>.
- 410 Pica N, Bouvier NM. 2012. Environmental factors affecting the transmission of respiratory  
411 viruses. *Curr Opin Virol* 2 (1), 90-5. <https://doi.org/10.1016/j.coviro.2011.12.003>.
- 412 Pope CA, 3rd. 1989. Respiratory disease associated with community air pollution and a steel mill,  
413 Utah Valley. *Am J Public Health* 79 (5), 623-8. <https://doi.org/10.2105/ajph.79.5.623>.
- 414 Prata DN, Rodrigues W, Bermejo PH. 2020. Temperature significantly changes COVID-19  
415 transmission in (sub)tropical cities of Brazil. *Sci Total Environ* 729 138862.  
416 <https://doi.org/10.1016/j.scitotenv.2020.138862>.
- 417 Siordia JA, Jr., 2020. Epidemiology and clinical features of COVID-19: A review of current  
418 literature. *J Clin Virol* 127 104357. <https://doi.org/10.1016/j.jcv.2020.104357>.
- 419 Tan J, Mu L, Huang J, et al., 2005. An initial investigation of the association between the SARS  
420 outbreak and weather: with the view of the environmental temperature and its variation.  
421 *J Epidemiol Community Health* 59 (3), 186-92.  
422 <https://doi.org/10.1136/jech.2004.020180>.
- 423 Tobias A, Molina T. 2020. Is temperature reducing the transmission of COVID-19? *Environ*  
424 *Res* 186 109553. <https://doi.org/10.1016/j.envres.2020.109553>.
- 425 van Doremalen N, Bushmaker T, Munster VJ. 2013. Stability of Middle East respiratory

- 426 syndrome coronavirus (MERS-CoV) under different environmental conditions. *Euro*  
427 *Surveill* 18 (38). <https://doi.org/10.2807/1560-7917.es2013.18.38.20590>.
- 428 Wang C, Horby PW, Hayden FG, et al., 2020a. A novel coronavirus outbreak of global health  
429 concern. *Lancet* 395 (10223), 470-473. [https://doi.org/10.1016/S0140-6736\(20\)30185-9](https://doi.org/10.1016/S0140-6736(20)30185-9).
- 430 Wang C, Pan R, Wan X, et al., 2020b. Immediate Psychological Responses and Associated  
431 Factors during the Initial Stage of the 2019 Coronavirus Disease (COVID-19) Epidemic  
432 among the General Population in China. *Int J Environ Res Public Health* 17 (5).  
433 <https://doi.org/10.3390/ijerph17051729>.
- 434 Wang M, Jiang A, Gong L, et al., 2020c. Temperature significant change COVID-19  
435 Transmission in 429 cities. *medRxiv* 2020.02.22.20025791.  
436 <https://doi.org/10.1101/2020.02.22.20025791>.
- 437 Wu F, Zhao S, Yu B, et al., 2020. A new coronavirus associated with human respiratory disease in  
438 China. *Nature*. 579 (1476-4687 (Electronic)), 265-269. [https://doi.org/doi:](https://doi.org/doi:10.1038/s41586-020-2008-3)  
439 [10.1038/s41586-020-2008-3](https://doi.org/doi:10.1038/s41586-020-2008-3).
- 440 Xie J, Zhu Y. 2020. Association between ambient temperature and COVID-19 infection in 122  
441 cities from China. *Sci Total Environ* 724 138201.  
442 <https://doi.org/10.1016/j.scitotenv.2020.138201>.
- 443 Xu Z, Hu W, Fau - Williams G, Williams G, Fau - Clements ACA, et al., 2013. Air pollution,  
444 temperature and pediatric influenza in Brisbane, Australia. *Environ Int*. 59 (1873-6750  
445 (Electronic)), 384-388. <https://doi.org/10.1016/j.envint.2013.06.022>.
- 446 Yao Y, Pan J, Liu Z, et al., 2020a. No association of COVID-19 transmission with temperature  
447 or UV radiation in Chinese cities. *Eur Respir J* 55 (5).  
448 <https://doi.org/10.1183/13993003.00517-2020>
- 449 Yao Y, Pan J, Liu Z, et al., 2020b. No association of COVID-19 transmission with temperature  
450 or UV radiation in Chinese cities. *Eur Respir J*.  
451 <https://doi.org/10.1183/13993003.00517-2020>.
- 452 Yusuf S, Piedimonte G, Auais A, et al., 2007. The relationship of meteorological conditions to  
453 the epidemic activity of respiratory syncytial virus. *Epidemiol Infect* 135 (7), 1077-90.  
454 <https://doi.org/10.1017/S095026880600776X>.
- 455 Zhou P, Yang XL, Wang XG, et al., 2020. A pneumonia outbreak associated with a new  
456 coronavirus of probable bat origin. *Nature* 579 (7798), 270-273.  
457 <https://doi.org/10.1038/s41586-020-2012-7>.
- 458 Zhu Y, Xie J, Huang F, et al., 2020. Association between short-term exposure to air pollution and  
459 COVID-19 infection: Evidence from China. *Sci Total Environ* 727 138704.  
460 <https://doi.org/10.1016/j.scitotenv.2020.138704>.

461  
462  
463  
464  
465  
466  
467  
468  
469

470

471

472

473

474

475 **Figure Captions**

476 **Figure 1.** Locations of 120 cities and total confirmed cases in each city in Mar. 18<sup>th</sup>,  
477 2020.

478 NA: Cities not included in this study.

479

480 **Figure 2.** Correlation analysis of meteorological factors and air pollutants

481

482 **Figure 3.** Correlation analysis of confirmed case counts and air pollutants,

483 meteorological parameters

484 Log (CCC), Log (confirmed cases counts)

485

486 **Figure 4.** Univariate negative binomial regression model of the relationship between

487 air pollutants, meteorological factors and confirmed case counts

488 A: lag 0 d; B: lag 3 d; C: lag 7 d; D: lag 14 d.

489

490 **Figure 5.** Multivariate negative binomial regression model of the relationship

491 between air pollutants, meteorological factors and confirmed case counts

492 A: lag 0 d; B: lag 3 d; C: lag 7 d; D: lag 14 d.

493

494

495

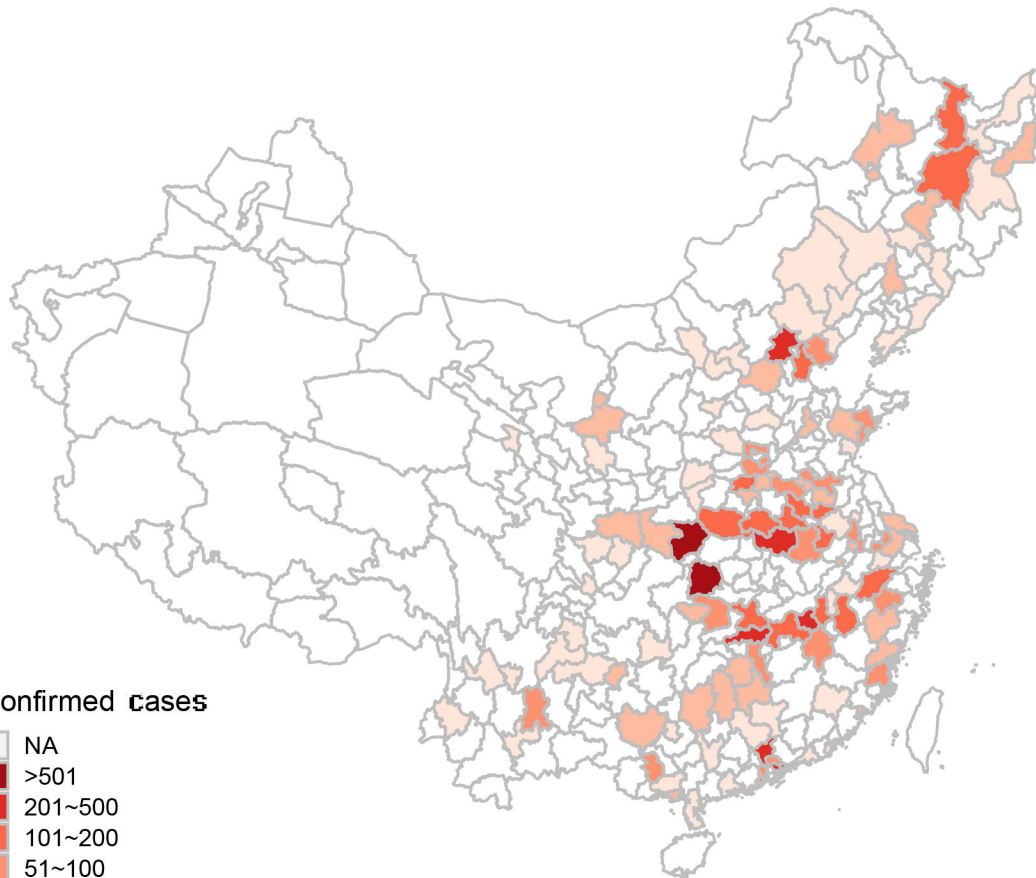

**Confirmed cases**

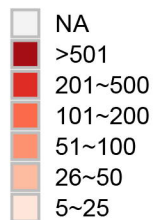

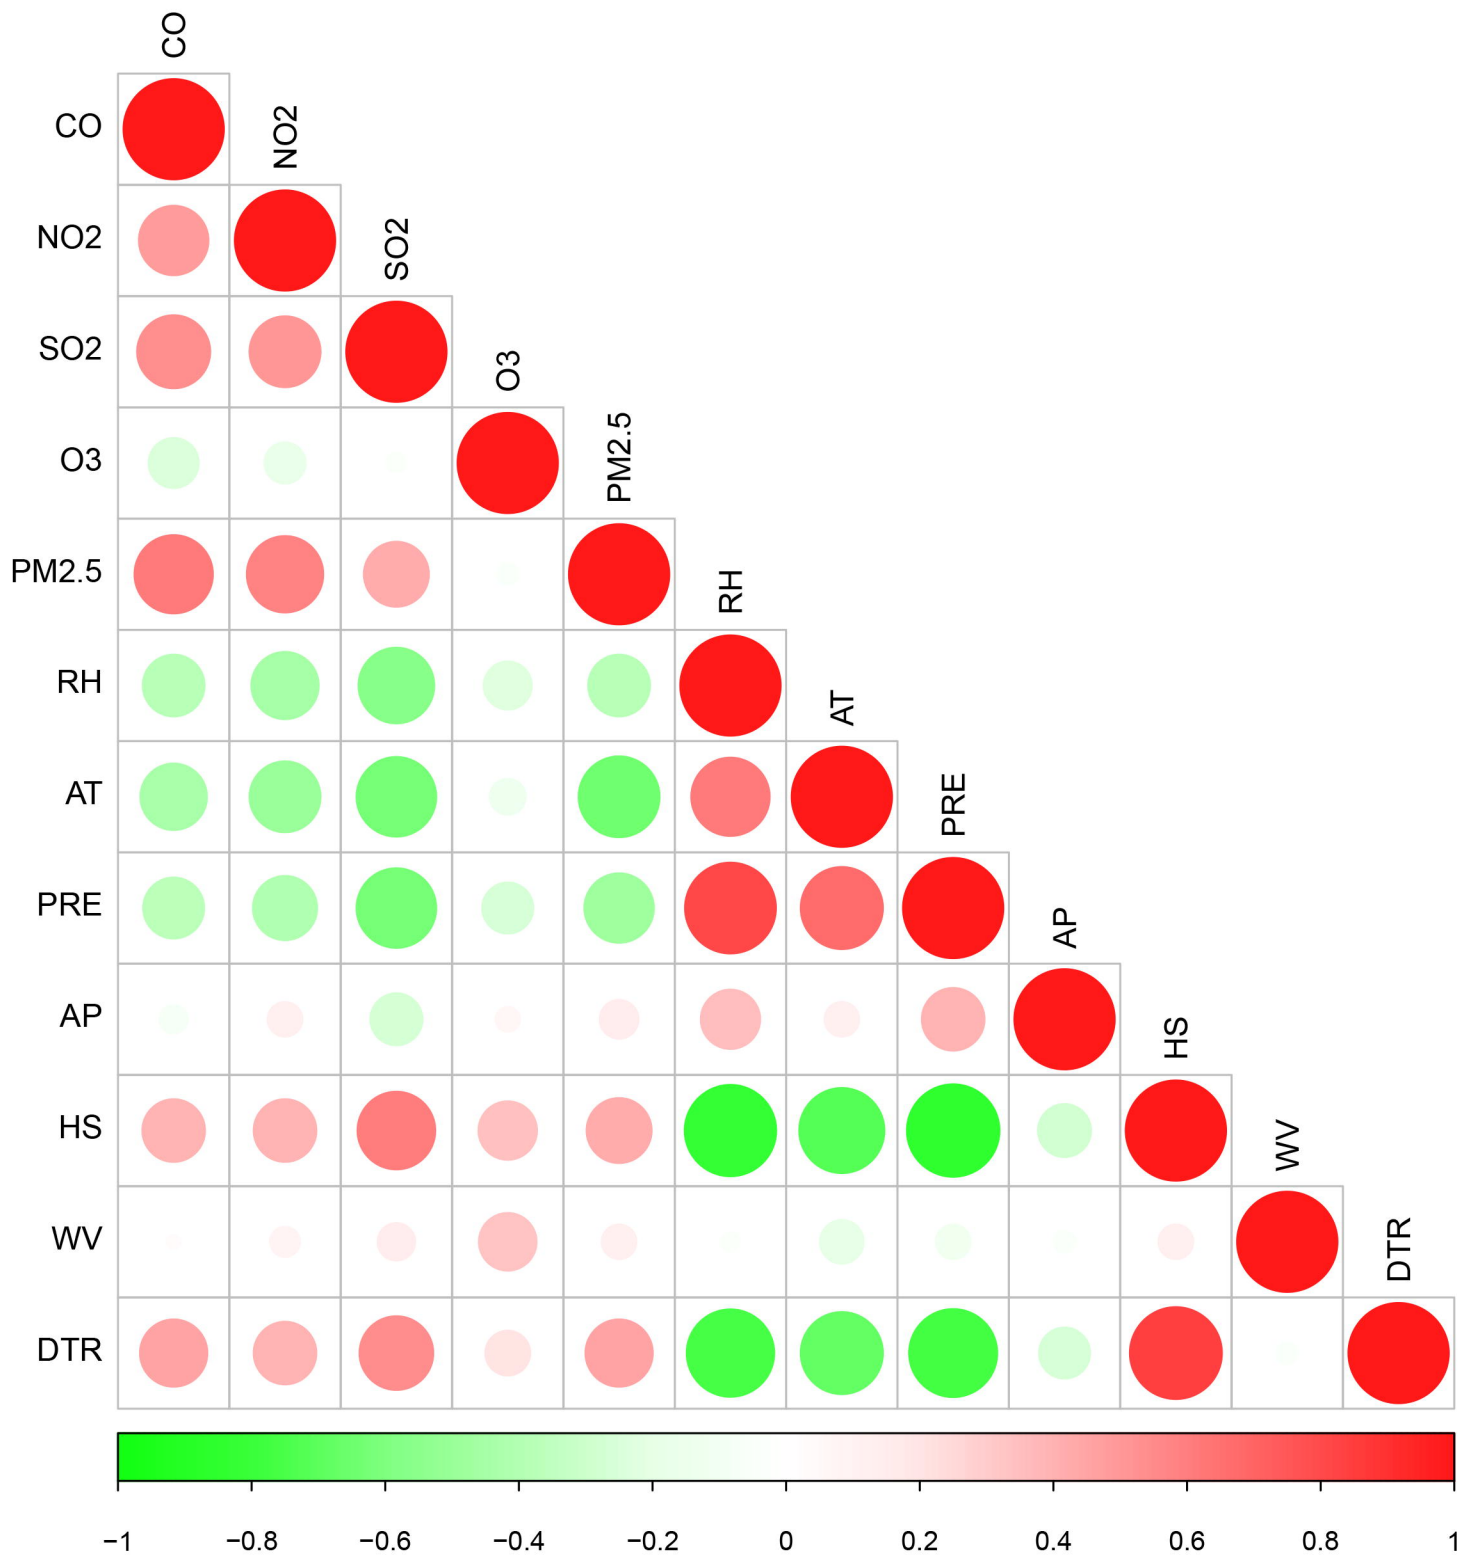

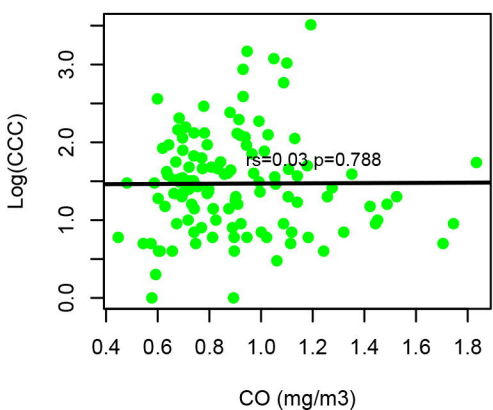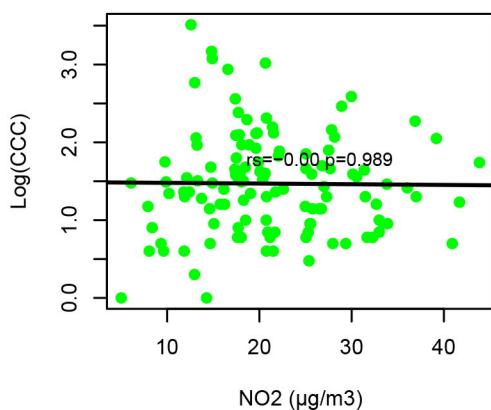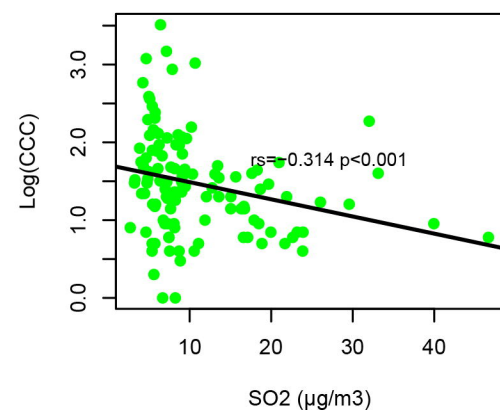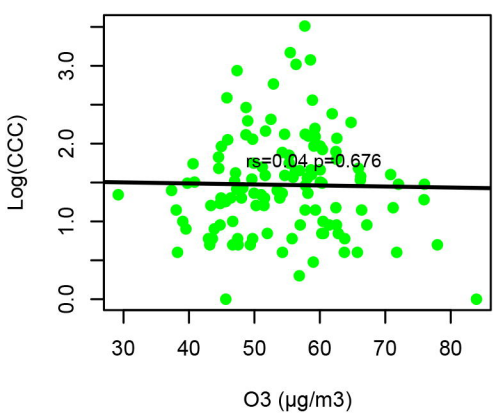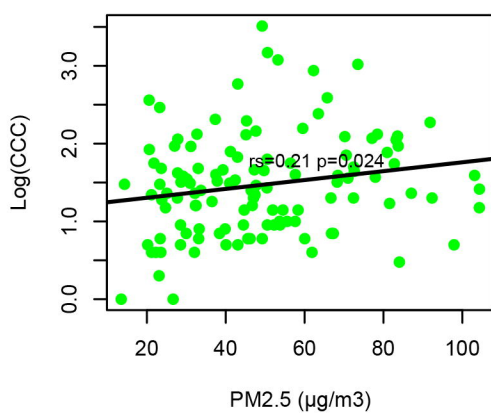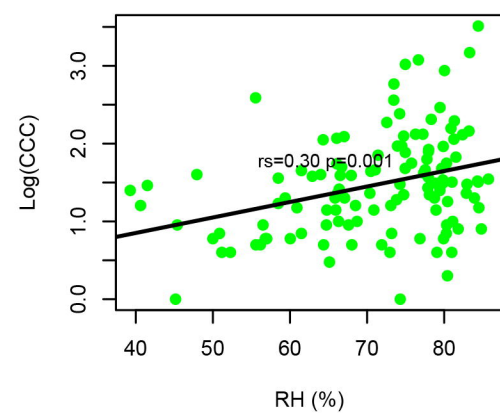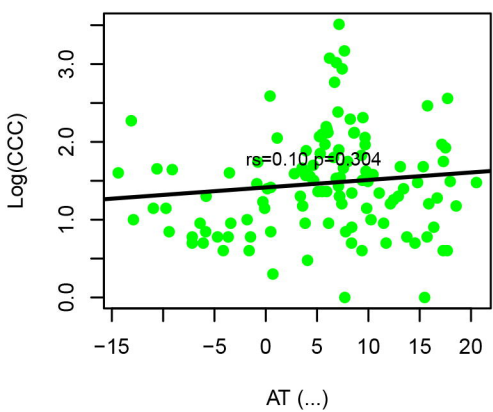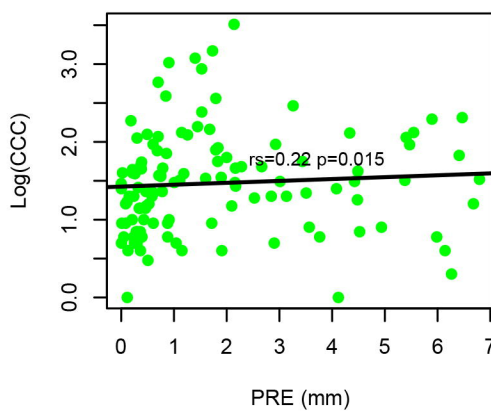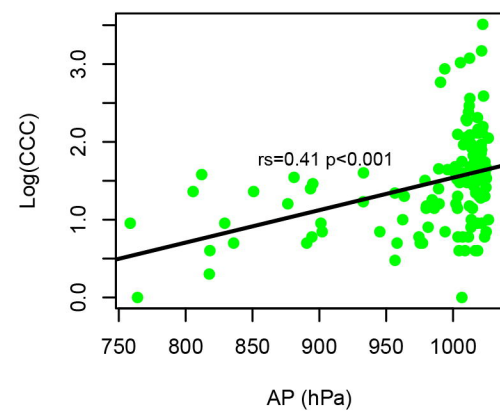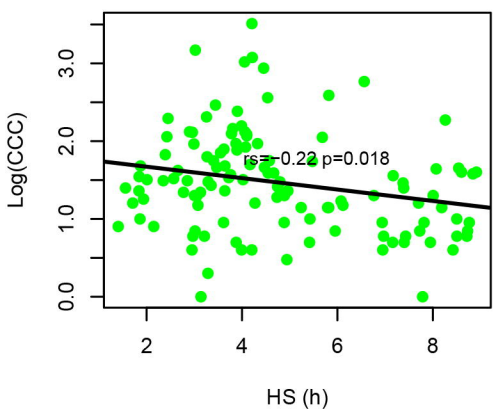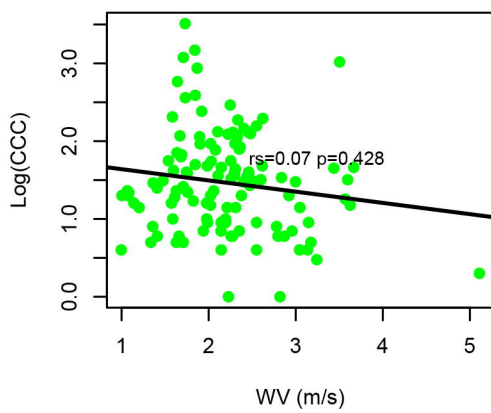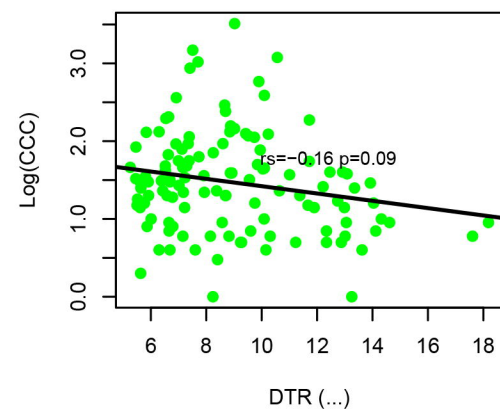

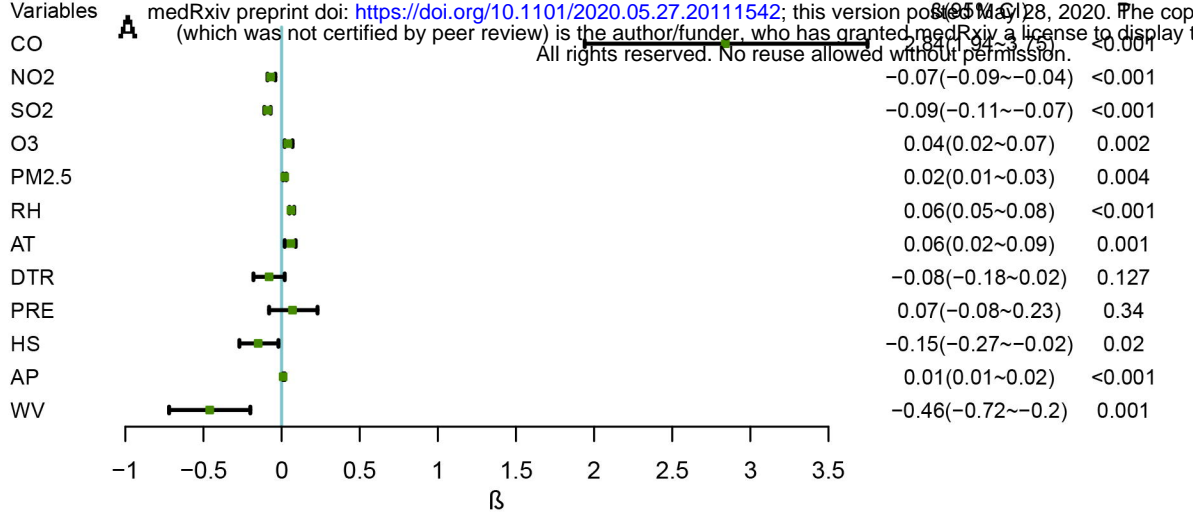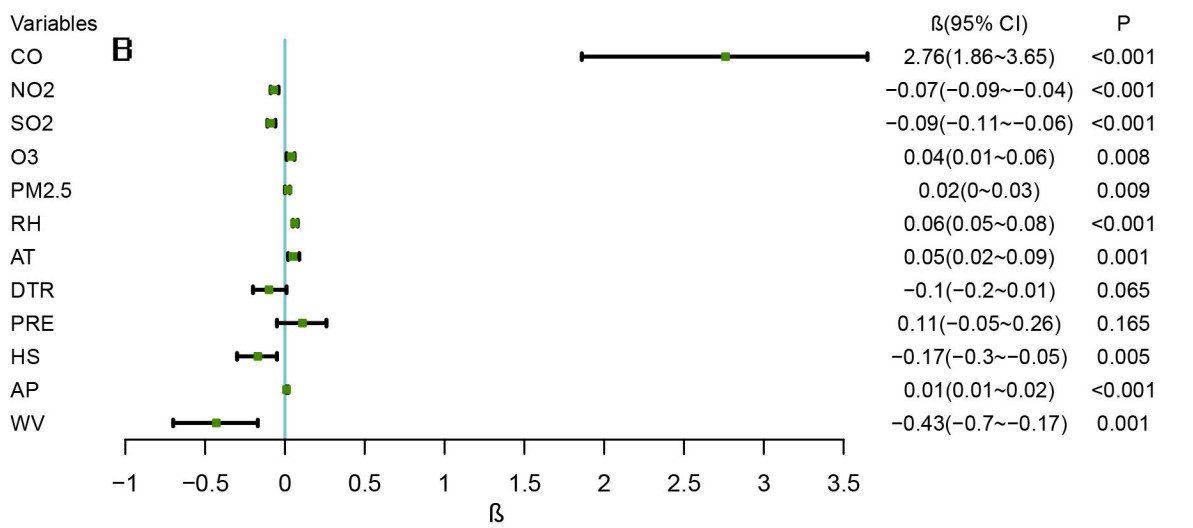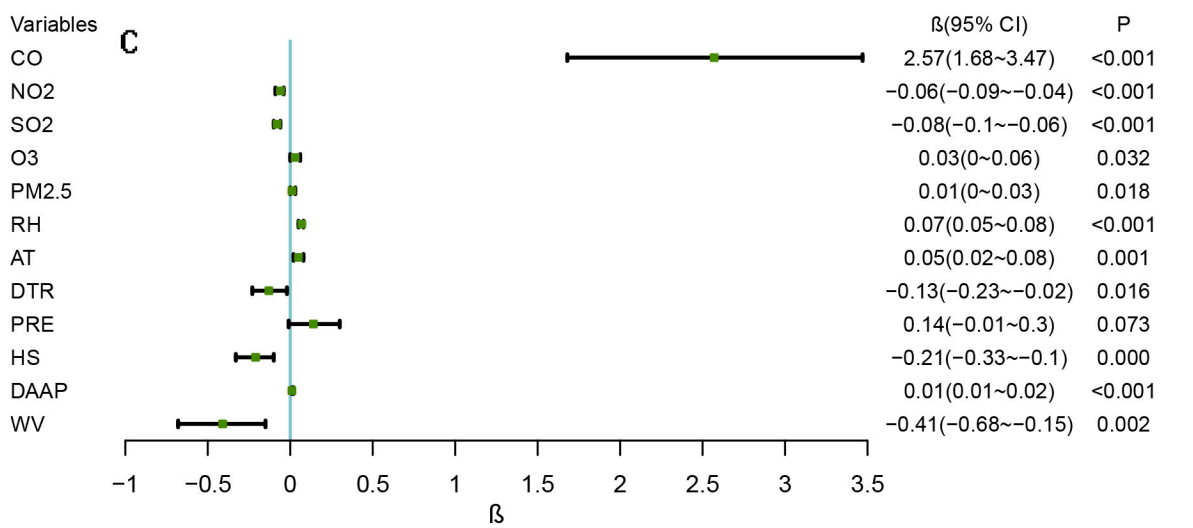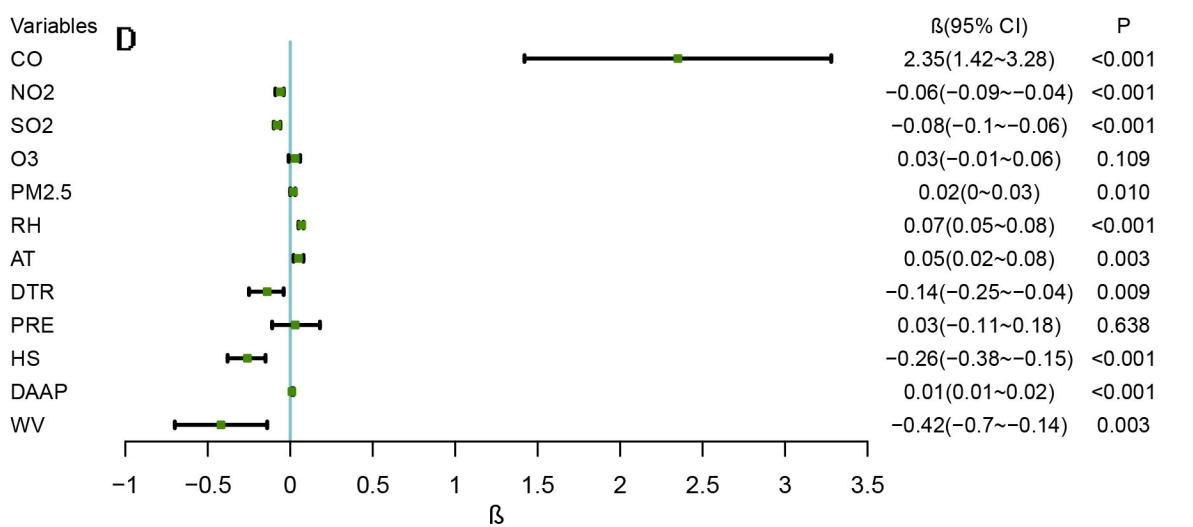



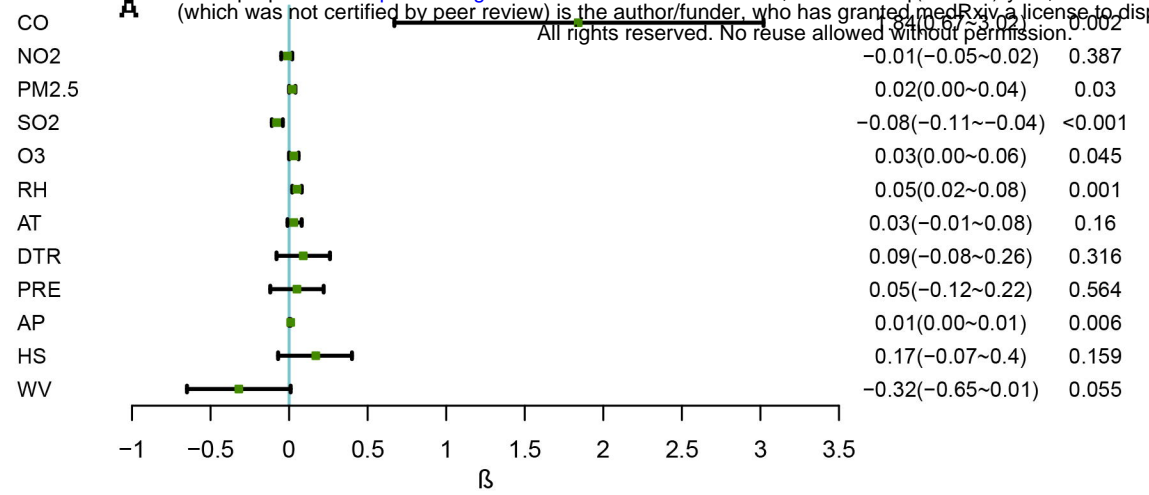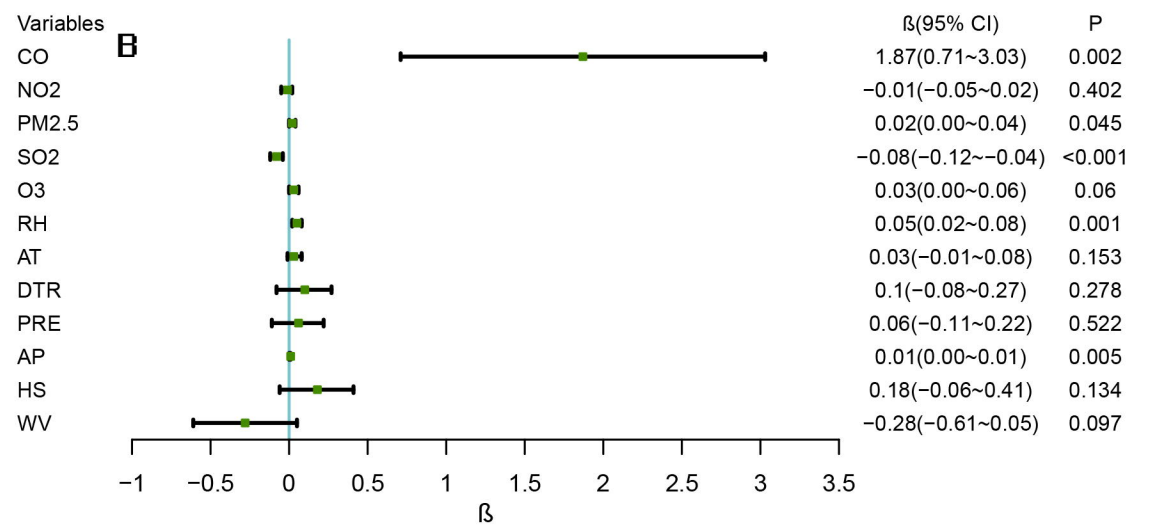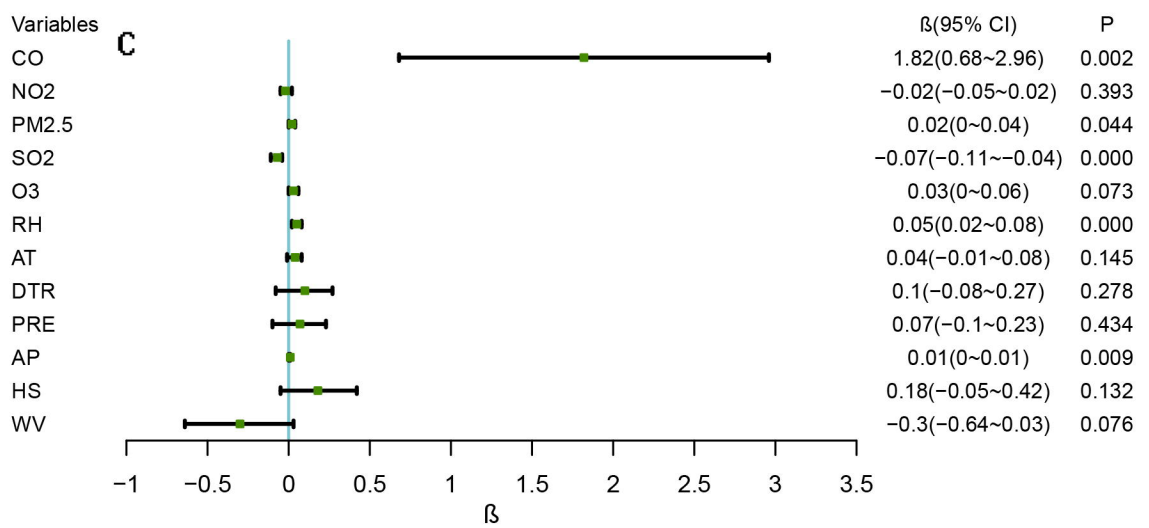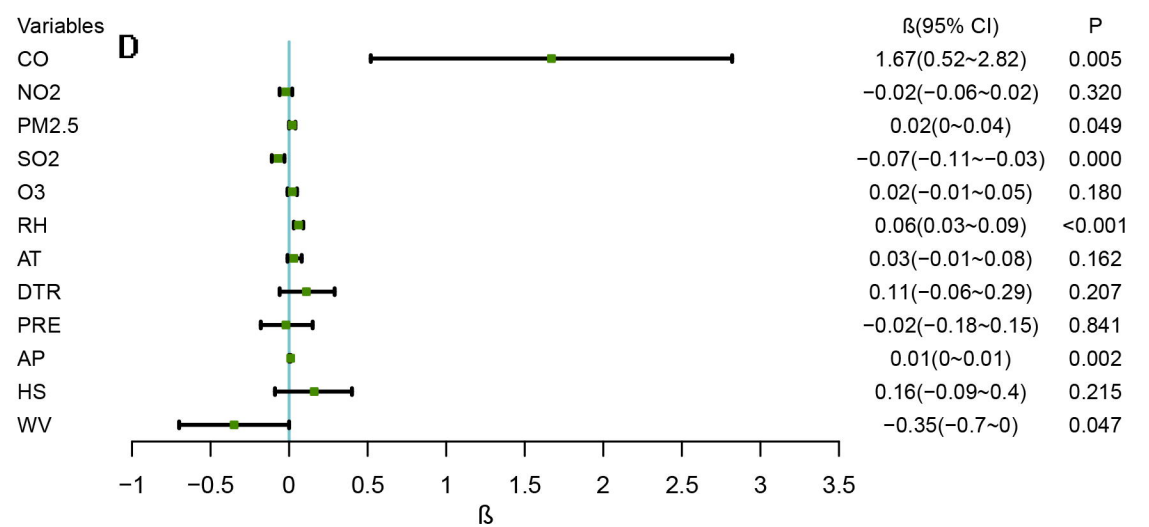

Source: https://medrxiv.org/content/medrxiv/early/2020/05/28/2020.05.27.20111542.full.pdf
